# Supplementary material for: Factors affecting providers’ delivery of intermittent preventive treatment for malaria in pregnancy: a five-country analysis of national service provision assessment surveys
Source: Malar J. 2014 Nov 20;13:440. doi: 10.1186/1475-2875-13-440 (PMC4247687; doi:10.1186/1475-2875-13-440)
Supplement: Supplementary file 1 — Additional file 1: Harmonization of the classification schemes for type of facility and the provider’s qualification. This table provides information on the different classification schemes for facility types and provider’s qualifications were harmonized to be used in the pooled analysis. (PDF 68 KB) [file 12936_2014_3599_MOESM1_ESM.pdf]

**ADDITIONAL FILE 1**
**Harmonization of the classification schemes for type of facility and the provider's qualification**

|                          |                              | Service provision assessment surveys                                                                     |                                        |                                                     |                                                                                    |                                                                                      |
|--------------------------|------------------------------|----------------------------------------------------------------------------------------------------------|----------------------------------------|-----------------------------------------------------|------------------------------------------------------------------------------------|--------------------------------------------------------------------------------------|
| Adopted classification   |                              | Kenya 2010                                                                                               | Namibia 2009                           | Rwanda 2007                                         | Tanzania 2006                                                                      | Uganda 2007                                                                          |
| Facility type            | Health centre                | Health centre<br>Maternity                                                                               | Health centre                          | Health centre<br>Polyclinic                         | Health centre                                                                      | Health centre IV                                                                     |
|                          | Health post/<br>Dispensary   | Clinic<br>Dispensary                                                                                     | Clinic                                 | Dispensary<br>Health post<br>Clinic                 | Dispensary<br>Stand-alone                                                          | Health centre II<br>Health centre III                                                |
|                          | Hospital                     | National hospital<br>Provincial hospital<br>District hospital<br>Sub-district hospital<br>Other hospital | Hospital                               | Hospital                                            | Hospital                                                                           | Hospital                                                                             |
|                          |                              |                                                                                                          |                                        |                                                     |                                                                                    |                                                                                      |
| Provider's qualification | Clinicians                   | Specialist<br>Medical officer<br>Clinical officer                                                        | Medical officer<br>Physician           | Gynaeco-<br>obstetrician                            | Consultant<br>Medical doctor<br>Medical officer<br>Clinical officer                | Consultant<br>Medical doctor<br>Clinical officer                                     |
|                          | Registered nurse/<br>Midwife | Registered nurse<br>Registered midwife                                                                   | Registered nurse<br>Registered midwife | Nurse A2                                            | Registered nurse<br>Nursing officer<br>Public health nurse                         | Registered nurse<br>Registered midwife<br>Comprehensive nurse<br>Public health nurse |
|                          | Enrolled nurse/<br>Midwife   | Enrolled nurse<br>Enrolled midwife                                                                       | Enrolled nurse<br>Enrolled midwife     | Nurse A3                                            | Nurse midwife<br>Trained nurse                                                     | Enrolled nurse<br>Enrolled midwife                                                   |
|                          | Other                        | BSN nurse<br>Nurse aide<br>Nutritionist<br>Other staff                                                   | Medical assistant<br>Nurse assistant   | Health auxiliary<br>Social assistant<br>A2<br>Other | Clinical assistant<br>Laboratory assistant<br>Auxiliary nurse<br>Medical assistant | Nursing assistant<br>Nursing aide                                                    |
