# Supplementary material for: Factors affecting providers’ delivery of intermittent preventive treatment for malaria in pregnancy: a five-country analysis of national service provision assessment surveys
Source: Malar J. 2014 Nov 20;13:440. doi: 10.1186/1475-2875-13-440 (PMC4247687; doi:10.1186/1475-2875-13-440)
Supplement: Supplementary file 5 — Additional file 5: Proportional increase attributable to selected modifiable determinants of intermittent preventive treatment for malaria in pregnancy (IPTp, administered as directly observed therapy) for Kenya, Namibia, Rwanda, Tanzania, and Uganda. The proportional increase in IPTp delivery was calculated using the population attributable fraction for each country separately. (PDF 63 KB) [file 12936_2014_3599_MOESM5_ESM.pdf]

**Table 5 Proportional increase attributable to selected modifiable determinants for intermittent preventive treatment for malaria in pregnancy (administered as directly observed therapy) for Kenya, Namibia, Rwanda, Tanzania, and Uganda.**

| Barriers/Drivers                            | Current prevalence* | Proportional increase in IPTp (95% UI) † |
|---------------------------------------------|---------------------|------------------------------------------|
| <b>Kenya</b>                                |                     |                                          |
| Removing user-fees for ANC medicines        | 30.6%               | 8.0% (3.6-17.4%)                         |
| Providing IPTp guidelines to all facilities | 45.1%               | 6.1% (2.1-16.7%)                         |
| Integrating IPTp in routine ANC services    | 94.5%               | 4.4% (1.6-8.0%)                          |
| Preventing stock-outs of SP                 | 11.1%               | 7.1% (3.0-12.1%)                         |
| Annual IPTp-training for providers          | 28.4%               | 14.3% (7.6-25.6%)                        |
| Joint effect                                |                     | 40.4% (26.5-58.7%)                       |
| <b>Namibia</b>                              |                     |                                          |
| Removing user-fees for ANC medicines        | 0.4%                | 0.1% (0.1-0.3%)                          |
| Providing IPTp guidelines to all facilities | 0.4%                | 11.7% (3.6-38.0%)                        |
| Integrating IPTp in routine ANC services    | 57.1%               | 48.4% (14.1-95.7%)                       |
| Preventing stock-outs of SP                 | 14.9%               | 9.8% (3.4-17.5%)                         |
| Annual IPTp-training for providers          | 22.9%               | 15.6% (7.9-28.9%)                        |
| Joint effect                                |                     | 80.3% (33.7-130.9%)                      |
| <b>Rwanda</b>                               |                     |                                          |
| Removing user-fees for ANC medicines        | 5.1%                | 1.3% (0.2-2.9%)                          |
| Providing IPTp guidelines to all facilities | 53.2%               | 5.2% (1.7-14.4%)                         |
| Integrating IPTp in routine ANC services    | 97.1%               | 2.2% (0.3-4.7%)                          |
| Preventing stock-outs of SP                 | 9.3%                | 5.9% (2.4-10.0%)                         |
| Annual IPTp-training for providers          | 24.0%               | 15.3% (8.2-27.8%)                        |
| Joint effect                                |                     | 31.4% (20.2-46.4%)                       |
| <b>Tanzania</b>                             |                     |                                          |
| Removing user-fees for ANC medicines        | 4.6%                | 1.1% (0.3-2.5%)                          |
| Providing IPTp guidelines to all facilities | 53.3%               | 5.2% (1.8-14.0%)                         |
| Integrating IPTp in routine ANC services    | 95.4%               | 3.6% (1.4-6.5%)                          |
| Preventing stock-outs of SP                 | 14.7%               | 9.7% (5.4-15.2%)                         |
| Annual IPTp-training for providers          | 17.5%               | 16.8% (9.0-30.9%)                        |
| Joint effect                                |                     | 40.0% (25.8-58.0%)                       |
| <b>Uganda</b>                               |                     |                                          |
| Removing user-fees for ANC medicines        | 4.1%                | 1.0% (0.1-2.4%)                          |
| Providing IPTp guidelines to all facilities | 51.3%               | 5.4% (1.7-14.8%)                         |
| Integrating IPTp in routine ANC services    | 99.6%               | 0.3% (0.1-0.9%)                          |
| Preventing stock-outs of SP                 | 7.2%                | 4.5% (0.6-9.1%)                          |
| Annual IPTp-training for providers          | 40.3%               | 11.6% (5.8-21.5%)                        |
| Joint effect                                |                     | 20.1% (11.4-31.9%)                       |

UI = uncertainty intervals; SP = sulphadoxine-pyrimethamine; IPTp = intermittent preventive treatment for malaria in pregnancy; ANC = antenatal care

\* Prevalence estimates were weighted using the appropriate survey weights multiplied by the number of ANC visits per month at the facility to represent the distribution of consultations for which the barrier/driver was present.

† Relative risks from the pooled model were used.
